# Supplementary material for: Vedolizumab adverse event profile: pharmacovigilance study based on FDA Adverse Event Reporting System (FAERS)
Source: Research Square preprint supplement (doi:10.21203/rs.3.rs-6552177/v1), 2025-07-11
Supplement: Supplementary file 1 [file 0ae30d1a5f3fb094907873b9.docx]

four grid table

|  | Drug-related ADEs | Non-drug-related ADEs | Total |
| --- | --- | --- | --- |
| Drug | a | b | a + b |
| Non-drug | c | d | c + d |
| Total | a + c | b + d | N = a + b + c + d |

| Method | Formula | ﻿Threshold |
| --- | --- | --- |
| ROR |  | a ≥ 3  ROR ≥ 3  ﻿95%CI (lower limit) > 1 |
|  |
|  |
| PRR |  | a ≥ 3  PRR ≥ 2  ﻿95%CI (lower limit) > 1 |
|  |
|  |
| BCPNN |  | IC025>0 |
|  |
|  |
|  |
|  |
| EBGM |  | EBGM05>2 |
|  |
|  |
