# Supplementary material for: Vedolizumab adverse event profile: pharmacovigilance study based on FDA Adverse Event Reporting System (FAERS)
Source: Research Square preprint supplement (doi:10.21203/rs.3.rs-6552177/v1), 2025-07-11
Supplement: Supplementary file 2 [file e2e18ef45baf9cc038313683.xlsx]

## Sheet: 全pt
soc_english	pt_english	Case Reports	ROR(95% CI)	PRR(95% CI)	chisq	IC(IC025)	EBGM(EBGM05)
gastrointestinal disorders	colitis ulcerative	8819	99.81(97.27, 102.41)	95.05(93.21, 96.93)	558741	6.02(5.99)	64.98(63.6)
injury, poisoning and procedural complications	vascular access site bruising	11	92.71(45.41, 189.27)	92.71(45.78, 187.74)	684.26	6(5.05)	63.88(35.16)
gastrointestinal disorders	mucous stools	738	59.9(55.17, 65.03)	59.66(55.16, 64.53)	32873.7	5.53(5.42)	46.3(43.22)
general disorders and administration site conditions	catheter site injury	37	58.94(40.87, 85.01)	58.93(40.61, 85.52)	1631.63	5.52(5.01)	45.86(33.76)
gastrointestinal disorders	rectal dysplasia	4	53.94(17.9, 162.52)	53.94(18, 161.66)	164.07	5.42(4.01)	42.79(17)
injury, poisoning and procedural complications	gastrointestinal anastomotic stenosis	11	51.75(26.68, 100.34)	51.74(26.57, 100.75)	435.88	5.37(4.47)	41.41(23.79)
general disorders and administration site conditions	vascular complication associated with device	3	46.68(13.3, 163.81)	46.68(13.32, 163.65)	108.95	5.25(3.68)	38.11(13.33)
injury, poisoning and procedural complications	diversion colitis	3	46.68(13.3, 163.81)	46.68(13.32, 163.65)	108.95	5.25(3.68)	38.11(13.33)
injury, poisoning and procedural complications	intestinal anastomosis complication	29	45.13(30.17, 67.49)	45.12(29.9, 68.1)	1022.96	5.21(4.65)	37.07(26.47)
gastrointestinal disorders	precancerous lesion of digestive tract	11	41.98(21.93, 80.37)	41.98(21.99, 80.16)	364.41	5.13(4.24)	34.94(20.29)
investigations	gastrointestinal stoma output increased	50	41.8(30.83, 56.68)	41.79(30.54, 57.18)	1649.87	5.12(4.69)	34.81(26.98)
gastrointestinal disorders	crohn's disease	6678	40.71(39.64, 41.81)	39.26(38.5, 40.04)	208755	5.05(5.01)	33.04(32.31)
pregnancy, puerperium and perinatal conditions	abnormal cord insertion	4	40.45(13.83, 118.36)	40.45(13.76, 118.87)	128.26	5.08(3.7)	33.88(13.8)
gastrointestinal disorders	defaecation urgency	698	39.72(36.62, 43.08)	39.57(36.59, 42.8)	21949.9	5.06(4.94)	33.26(31.07)
gastrointestinal disorders	anal cyst	5	37.46(14.42, 97.27)	37.46(14.34, 97.87)	149.7	4.99(3.73)	31.76(14.29)
gastrointestinal disorders	anal blister	3	35.69(10.46, 121.8)	35.69(10.38, 122.69)	85.99	4.93(3.39)	30.49(10.92)
general disorders and administration site conditions	infusion site coldness	11	35.32(18.61, 67.01)	35.32(18.5, 67.44)	312.27	4.92(4.04)	30.22(17.68)
gastrointestinal disorders	frequent bowel movements	2445	33.24(31.84, 34.7)	32.81(31.55, 34.12)	64903	4.83(4.76)	28.37(27.36)
investigations	drug metabolising enzyme increased	3	31.94(9.45, 107.93)	31.94(9.48, 107.67)	77.65	4.79(3.26)	27.72(10.01)
nervous system disorders	primary progressive aphasia	3	31.94(9.45, 107.93)	31.94(9.48, 107.67)	77.65	4.79(3.26)	27.72(10.01)
pregnancy, puerperium and perinatal conditions	pregnancy	1189	31.25(29.39, 33.22)	31.05(29.28, 32.93)	29985.8	4.76(4.67)	27.05(25.7)
gastrointestinal disorders	pouchitis	62	31.21(23.88, 40.77)	31.2(23.71, 41.05)	1569.99	4.76(4.38)	27.16(21.71)
gastrointestinal disorders	anorectal stenosis	4	31.12(10.86, 89.17)	31.12(10.8, 89.68)	101.05	4.76(3.4)	27.1(11.23)
gastrointestinal disorders	gastrointestinal scarring	55	30.16(22.72, 40.03)	30.15(22.91, 39.67)	1348.93	4.72(4.32)	26.37(20.8)
infections and infestations	haemorrhoid infection	5	29.75(11.63, 76.06)	29.75(11.61, 76.22)	121.09	4.7(3.47)	26.06(11.88)
gastrointestinal disorders	colon dysplasia	26	29.06(19.26, 43.83)	29.05(19.25, 43.84)	615.86	4.67(4.1)	25.53(18.1)
investigations	pus in stool	10	28.49(14.7, 55.23)	28.49(14.63, 55.48)	232.49	4.65(3.74)	25.09(14.42)
gastrointestinal disorders	enterocolonic fistula	9	28.45(14.16, 57.15)	28.44(14.04, 57.59)	208.93	4.65(3.69)	25.06(13.98)
injury, poisoning and procedural complications	vascular access site pain	8	26.97(12.9, 56.4)	26.97(12.81, 56.8)	176.51	4.58(3.58)	23.91(12.9)
musculoskeletal and connective tissue disorders	arthritis enteropathic	22	26.33(16.89, 41.06)	26.33(16.78, 41.33)	474.36	4.55(3.93)	23.41(16.14)
vascular disorders	poor venous access	728	26.31(24.35, 28.43)	26.21(24.23, 28.35)	15630.6	4.54(4.43)	23.32(21.86)
gastrointestinal disorders	rectal stenosis	24	25.42(16.63, 38.86)	25.42(16.52, 39.12)	500.09	4.5(3.91)	22.69(15.91)
gastrointestinal disorders	intestinal stenosis	298	25.22(22.35, 28.45)	25.18(22.39, 28.32)	6153.36	4.49(4.32)	22.5(20.34)
infections and infestations	stoma site abscess	21	24.99(15.88, 39.32)	24.99(15.92, 39.22)	430.38	4.48(3.85)	22.35(15.29)
infections and infestations	intestinal fistula infection	4	23.8(8.44, 67.06)	23.8(8.42, 67.25)	78.16	4.42(3.08)	21.4(8.99)
general disorders and administration site conditions	infusion site paraesthesia	6	23.34(10.02, 54.34)	23.34(10.05, 54.22)	115.02	4.39(3.26)	21.03(10.37)
gastrointestinal disorders	ileal stenosis	103	23.29(18.99, 28.56)	23.28(19.14, 28.32)	1969.43	4.39(4.1)	20.98(17.69)
investigations	drug level decreased	707	23.2(21.46, 25.08)	23.11(21.37, 24.99)	13426.3	4.38(4.27)	20.85(19.53)
investigations	faecal calprotectin increased	238	23.04(20.15, 26.35)	23.01(20.06, 26.39)	4499.45	4.38(4.18)	20.76(18.56)
injury, poisoning and procedural complications	stoma prolapse	6	22.9(9.84, 53.27)	22.9(9.86, 53.19)	112.87	4.37(3.24)	20.67(10.2)
infections and infestations	rectal abscess	109	22.7(18.62, 27.67)	22.68(18.64, 27.59)	2031.43	4.36(4.07)	20.5(17.37)
infections and infestations	abscess intestinal	131	22.51(18.79, 26.96)	22.49(18.85, 26.83)	2421.27	4.35(4.09)	20.34(17.49)
infections and infestations	colostomy infection	3	22.47(6.82, 74.08)	22.47(6.8, 74.28)	55.4	4.35(2.84)	20.33(7.49)
injury, poisoning and procedural complications	stomal hernia	27	22.39(15.04, 33.31)	22.38(15.12, 33.12)	496.58	4.34(3.78)	20.25(14.52)
general disorders and administration site conditions	vessel puncture site pain	6	22.07(9.5, 51.25)	22.07(9.5, 51.27)	108.8	4.32(3.19)	19.99(9.88)
infections and infestations	anal abscess	352	21.85(19.58, 24.4)	21.81(19.39, 24.53)	6310.5	4.31(4.15)	19.79(18.05)
infections and infestations	skin graft infection	3	21.67(6.59, 71.29)	21.67(6.56, 71.63)	53.43	4.3(2.8)	19.67(7.26)
gastrointestinal disorders	large intestinal stenosis	127	20.78(17.31, 24.95)	20.77(17.41, 24.78)	2167.04	4.24(3.98)	18.93(16.24)
infections and infestations	blastocystis infection	5	20.64(8.22, 51.8)	20.64(8.22, 51.85)	84.79	4.23(3.02)	18.82(8.71)
gastrointestinal disorders	haematochezia	3169	19.92(19.2, 20.67)	19.59(18.84, 20.37)	51023.7	4.17(4.11)	17.95(17.41)
general disorders and administration site conditions	pseudopolyp	19	19.91(12.43, 31.9)	19.91(12.44, 31.87)	310.7	4.19(3.53)	18.22(12.28)
gastrointestinal disorders	bile acid malabsorption	15	19.45(11.45, 33.04)	19.45(11.46, 33.02)	239.48	4.16(3.42)	17.83(11.45)
vascular disorders	neurogenic shock	31	19.36(13.39, 27.98)	19.35(13.33, 28.08)	492.43	4.15(3.63)	17.75(13.04)
general disorders and administration site conditions	vaccination site warmth	4	19.26(6.91, 53.72)	19.26(6.95, 53.37)	63.24	4.14(2.81)	17.68(7.49)
gastrointestinal disorders	anal skin tags	9	19.16(9.67, 37.96)	19.16(9.65, 38.05)	141.52	4.14(3.2)	17.59(9.93)
hepatobiliary disorders	cholangitis sclerosing	115	19.16(15.82, 23.19)	19.14(15.73, 23.28)	1806.71	4.14(3.86)	17.58(14.98)
investigations	faecal volume decreased	24	19.11(12.58, 29.05)	19.11(12.66, 28.84)	376.38	4.13(3.54)	17.55(12.36)
injury, poisoning and procedural complications	drain site complication	5	18.73(7.49, 46.82)	18.73(7.46, 47.06)	76.8	4.11(2.9)	17.23(8)
gastrointestinal disorders	gastrointestinal polyp	21	18.71(11.97, 29.26)	18.71(11.92, 29.37)	322.26	4.11(3.48)	17.21(11.84)
gastrointestinal disorders	anal fistula	289	18.66(16.54, 21.05)	18.63(16.56, 20.95)	4416.35	4.1(3.93)	17.15(15.5)
gastrointestinal disorders	gastrointestinal dysplasia	6	18.39(7.97, 42.41)	18.39(7.92, 42.72)	90.43	4.08(2.96)	16.94(8.42)
renal and urinary disorders	renal vein compression	3	18.39(5.64, 59.96)	18.39(5.67, 59.61)	45.22	4.08(2.59)	16.94(6.3)
infections and infestations	anal infection	14	18.27(10.57, 31.57)	18.27(10.55, 31.63)	209.61	4.07(3.31)	16.84(10.65)
general disorders and administration site conditions	therapeutic reaction time decreased	1758	1734.45(1501.69, 2003.29)	1717.81(1497.58, 1970.43)	317774	7.51(7.41)	181.85(161.2)
neoplasms benign, malignant and unspecified (incl cysts and polyps)	colorectal adenoma	13	17.65(10.01, 31.11)	17.65(10, 31.16)	187.77	4.03(3.24)	16.31(10.15)
gastrointestinal disorders	anal stenosis	24	17.1(11.27, 25.93)	17.09(11.32, 25.79)	335.3	3.99(3.4)	15.84(11.18)
infections and infestations	infected fistula	32	16.99(11.85, 24.37)	16.99(11.94, 24.18)	444.21	3.98(3.47)	15.75(11.65)
general disorders and administration site conditions	steroid dependence	40	16.93(12.26, 23.38)	16.93(12.37, 23.17)	553.13	3.97(3.51)	15.7(11.98)
gastrointestinal disorders	rectal tenesmus	56	16.89(12.86, 22.18)	16.88(12.83, 22.21)	772.21	3.97(3.58)	15.66(12.46)
infections and infestations	anal fistula infection	9	16.86(8.54, 33.27)	16.86(8.49, 33.48)	123.91	3.97(3.04)	15.64(8.85)
neoplasms benign, malignant and unspecified (incl cysts and polyps)	neoplasm of appendix	6	16.86(7.33, 38.77)	16.86(7.4, 38.4)	82.61	3.97(2.85)	15.64(7.79)
skin and subcutaneous tissue disorders	umbilical discharge	5	16.58(6.66, 41.26)	16.58(6.6, 41.65)	67.65	3.94(2.74)	15.4(7.18)
gastrointestinal disorders	jejunal stenosis	4	16.51(5.96, 45.76)	16.51(5.96, 45.75)	53.89	3.94(2.62)	15.34(6.54)
investigations	colonoscopy abnormal	17	16.45(10.04, 26.97)	16.45(10.08, 26.85)	228.17	3.93(3.24)	15.29(10.11)
neoplasms benign, malignant and unspecified (incl cysts and polyps)	endocrine neoplasm	3	16.4(5.06, 53.19)	16.4(5.06, 53.16)	40.13	3.93(2.45)	15.25(5.7)
gastrointestinal disorders	proctitis ulcerative	20	16.25(10.3, 25.62)	16.25(10.35, 25.51)	264.88	3.92(3.28)	15.11(10.32)
injury, poisoning and procedural complications	stoma obstruction	13	16.03(9.12, 28.2)	16.03(9.08, 28.3)	169.79	3.9(3.12)	14.93(9.31)
gastrointestinal disorders	intestinal fistula	63	15.66(12.12, 20.24)	15.65(12.13, 20.19)	802.2	3.87(3.5)	14.6(11.78)
gastrointestinal disorders	abdominal incarcerated hernia	3	15.56(4.81, 50.35)	15.56(4.8, 50.44)	37.95	3.86(2.38)	14.52(5.43)
general disorders and administration site conditions	vaccination site pruritus	3	15.56(4.81, 50.35)	15.56(4.8, 50.44)	37.95	3.86(2.38)	14.52(5.43)
gastrointestinal disorders	faeces soft	366	15.18(13.65, 16.88)	15.15(13.74, 16.71)	4500.1	3.82(3.67)	14.16(12.96)
injury, poisoning and procedural complications	anastomotic ulcer	18	14.62(9.06, 23.59)	14.62(9.13, 23.4)	213.02	3.78(3.11)	13.7(9.18)
injury, poisoning and procedural complications	postoperative ileus	20	14.55(9.24, 22.91)	14.55(9.27, 22.84)	235.47	3.77(3.13)	13.64(9.33)
gastrointestinal disorders	anal spasm	3	14.11(4.38, 45.49)	14.11(4.35, 45.74)	34.16	3.73(2.26)	13.26(4.98)
gastrointestinal disorders	gastrointestinal inflammation	342	14(12.54, 15.62)	13.97(12.42, 15.71)	3853.31	3.72(3.56)	13.13(11.98)
general disorders and administration site conditions	loss of therapeutic response	613	132.63(119.78, 146.85)	132.19(119.85, 145.8)	48267.7	6.33(6.19)	80.34(73.77)
musculoskeletal and connective tissue disorders	fistula inflammation	6	13.64(5.97, 31.17)	13.64(5.99, 31.07)	65.82	3.68(2.58)	12.84(6.43)
infections and infestations	gastroenteritis escherichia coli	18	13.59(8.43, 21.9)	13.59(8.49, 21.75)	196.65	3.68(3.01)	12.79(8.58)
gastrointestinal disorders	anal fissure	208	13.48(11.72, 15.51)	13.47(11.74, 15.45)	2250.97	3.67(3.46)	12.69(11.28)
infections and infestations	gastrointestinal bacterial infection	49	13.31(9.97, 17.77)	13.3(9.91, 17.85)	523.16	3.65(3.24)	12.54(9.85)
gastrointestinal disorders	abdominal hernia obstructive	5	13.31(5.38, 32.89)	13.31(5.4, 32.79)	53.4	3.65(2.45)	12.55(5.88)
musculoskeletal and connective tissue disorders	fistula	406	13.04(11.79, 14.42)	13.01(11.8, 14.35)	4230.82	3.62(3.47)	12.29(11.3)
gastrointestinal disorders	dyschezia	131	12.82(10.75, 15.3)	12.81(10.74, 15.28)	1341.8	3.6(3.34)	12.11(10.45)
infections and infestations	external ear cellulitis	5	12.8(5.18, 31.61)	12.8(5.2, 31.53)	51.16	3.6(2.4)	12.1(5.68)
neoplasms benign, malignant and unspecified (incl cysts and polyps)	intestinal adenocarcinoma	7	12.76(5.94, 27.38)	12.76(5.94, 27.4)	71.34	3.59(2.56)	12.06(6.36)
gastrointestinal disorders	proctalgia	222	12.71(11.09, 14.55)	12.69(11.06, 14.56)	2250.11	3.59(3.39)	12(10.71)
infections and infestations	herpes simplex meningitis	3	12.64(3.94, 40.59)	12.64(3.9, 40.97)	30.27	3.58(2.11)	11.96(4.51)
gastrointestinal disorders	proctitis	100	12.54(10.24, 15.35)	12.53(10.3, 15.24)	999.32	3.57(3.28)	11.86(10.01)
injury, poisoning and procedural complications	post procedural constipation	5	12.49(5.06, 30.81)	12.49(5.07, 30.77)	49.76	3.56(2.37)	11.82(5.55)
gastrointestinal disorders	small intestinal stenosis	38	12.48(8.99, 17.32)	12.48(8.94, 17.41)	377.89	3.56(3.1)	11.81(8.98)
investigations	sars-cov-1 test positive	21	111.79(65.61, 190.49)	111.78(65.85, 189.75)	1484.93	6.18(5.47)	72.35(46.32)
gastrointestinal disorders	intestinal ulcer	53	11.97(9.07, 15.79)	11.96(9.09, 15.74)	502.82	3.5(3.11)	11.35(9)
infections and infestations	bartholin's abscess	3	11.9(3.71, 38.12)	11.9(3.74, 37.82)	28.28	3.5(2.03)	11.29(4.26)

## Sheet: 前100个报告的pt
soc_english	pt_english	Case Reports	ROR(95% CI)	PRR(95% CI)	chisq	IC(IC025)	EBGM(EBGM05)
gastrointestinal disorders	colitis ulcerative	8819	99.81(97.27, 102.41)	95.05(93.21, 96.93)	558741	6.02(5.99)	64.98(63.6)
gastrointestinal disorders	crohn's disease	6678	40.71(39.64, 41.81)	39.26(38.5, 40.04)	208755	5.05(5.01)	33.04(32.31)
gastrointestinal disorders	haematochezia	3169	19.92(19.2, 20.67)	19.59(18.84, 20.37)	51023.7	4.17(4.11)	17.95(17.41)
gastrointestinal disorders	frequent bowel movements	2445	33.24(31.84, 34.7)	32.81(31.55, 34.12)	64903	4.83(4.76)	28.37(27.36)
general disorders and administration site conditions	therapeutic reaction time decreased	1758	1734.45(1501.69, 2003.29)	1717.81(1497.58, 1970.43)	317774	7.51(7.41)	181.85(161.2)
pregnancy, puerperium and perinatal conditions	pregnancy	1189	31.25(29.39, 33.22)	31.05(29.28, 32.93)	29985.8	4.76(4.67)	27.05(25.7)
gastrointestinal disorders	mucous stools	738	59.9(55.17, 65.03)	59.66(55.16, 64.53)	32873.7	5.53(5.42)	46.3(43.22)
vascular disorders	poor venous access	728	26.31(24.35, 28.43)	26.21(24.23, 28.35)	15630.6	4.54(4.43)	23.32(21.86)
investigations	drug level decreased	707	23.2(21.46, 25.08)	23.11(21.37, 24.99)	13426.3	4.38(4.27)	20.85(19.53)
gastrointestinal disorders	defaecation urgency	698	39.72(36.62, 43.08)	39.57(36.59, 42.8)	21949.9	5.06(4.94)	33.26(31.07)
general disorders and administration site conditions	loss of therapeutic response	613	132.63(119.78, 146.85)	132.19(119.85, 145.8)	48267.7	6.33(6.19)	80.34(73.77)
musculoskeletal and connective tissue disorders	fistula	406	13.04(11.79, 14.42)	13.01(11.8, 14.35)	4230.82	3.62(3.47)	12.29(11.3)
gastrointestinal disorders	faeces soft	366	15.18(13.65, 16.88)	15.15(13.74, 16.71)	4500.1	3.82(3.67)	14.16(12.96)
infections and infestations	anal abscess	352	21.85(19.58, 24.4)	21.81(19.39, 24.53)	6310.5	4.31(4.15)	19.79(18.05)
gastrointestinal disorders	gastrointestinal inflammation	342	14(12.54, 15.62)	13.97(12.42, 15.71)	3853.31	3.72(3.56)	13.13(11.98)
gastrointestinal disorders	intestinal stenosis	298	25.22(22.35, 28.45)	25.18(22.39, 28.32)	6153.36	4.49(4.32)	22.5(20.34)
gastrointestinal disorders	anal fistula	289	18.66(16.54, 21.05)	18.63(16.56, 20.95)	4416.35	4.1(3.93)	17.15(15.5)
investigations	faecal calprotectin increased	238	23.04(20.15, 26.35)	23.01(20.06, 26.39)	4499.45	4.38(4.18)	20.76(18.56)
gastrointestinal disorders	proctalgia	222	12.71(11.09, 14.55)	12.69(11.06, 14.56)	2250.11	3.59(3.39)	12(10.71)
gastrointestinal disorders	anal fissure	208	13.48(11.72, 15.51)	13.47(11.74, 15.45)	2250.97	3.67(3.46)	12.69(11.28)
infections and infestations	abscess intestinal	131	22.51(18.79, 26.96)	22.49(18.85, 26.83)	2421.27	4.35(4.09)	20.34(17.49)
gastrointestinal disorders	dyschezia	131	12.82(10.75, 15.3)	12.81(10.74, 15.28)	1341.8	3.6(3.34)	12.11(10.45)
gastrointestinal disorders	large intestinal stenosis	127	20.78(17.31, 24.95)	20.77(17.41, 24.78)	2167.04	4.24(3.98)	18.93(16.24)
hepatobiliary disorders	cholangitis sclerosing	115	19.16(15.82, 23.19)	19.14(15.73, 23.28)	1806.71	4.14(3.86)	17.58(14.98)
infections and infestations	rectal abscess	109	22.7(18.62, 27.67)	22.68(18.64, 27.59)	2031.43	4.36(4.07)	20.5(17.37)
gastrointestinal disorders	ileal stenosis	103	23.29(18.99, 28.56)	23.28(19.14, 28.32)	1969.43	4.39(4.1)	20.98(17.69)
gastrointestinal disorders	proctitis	100	12.54(10.24, 15.35)	12.53(10.3, 15.24)	999.32	3.57(3.28)	11.86(10.01)

## Sheet: ror排名前30
soc_english	pt_english	Case Reports	ROR(95% CI)	PRR(95% CI)	chisq	IC(IC025)	EBGM(EBGM05)
gastrointestinal disorders	colitis ulcerative	8819	99.81(97.27, 102.41)	95.05(93.21, 96.93)	558741	6.02(5.99)	64.98(63.6)
injury, poisoning and procedural complications	vascular access site bruising	11	92.71(45.41, 189.27)	92.71(45.78, 187.74)	684.26	6(5.05)	63.88(35.16)
gastrointestinal disorders	mucous stools	738	59.9(55.17, 65.03)	59.66(55.16, 64.53)	32873.7	5.53(5.42)	46.3(43.22)
general disorders and administration site conditions	catheter site injury	37	58.94(40.87, 85.01)	58.93(40.61, 85.52)	1631.63	5.52(5.01)	45.86(33.76)
gastrointestinal disorders	rectal dysplasia	4	53.94(17.9, 162.52)	53.94(18, 161.66)	164.07	5.42(4.01)	42.79(17)
injury, poisoning and procedural complications	gastrointestinal anastomotic stenosis	11	51.75(26.68, 100.34)	51.74(26.57, 100.75)	435.88	5.37(4.47)	41.41(23.79)
general disorders and administration site conditions	vascular complication associated with device	3	46.68(13.3, 163.81)	46.68(13.32, 163.65)	108.95	5.25(3.68)	38.11(13.33)
injury, poisoning and procedural complications	diversion colitis	3	46.68(13.3, 163.81)	46.68(13.32, 163.65)	108.95	5.25(3.68)	38.11(13.33)
injury, poisoning and procedural complications	intestinal anastomosis complication	29	45.13(30.17, 67.49)	45.12(29.9, 68.1)	1022.96	5.21(4.65)	37.07(26.47)
gastrointestinal disorders	precancerous lesion of digestive tract	11	41.98(21.93, 80.37)	41.98(21.99, 80.16)	364.41	5.13(4.24)	34.94(20.29)
investigations	gastrointestinal stoma output increased	50	41.8(30.83, 56.68)	41.79(30.54, 57.18)	1649.87	5.12(4.69)	34.81(26.98)
gastrointestinal disorders	crohn's disease	6678	40.71(39.64, 41.81)	39.26(38.5, 40.04)	208755	5.05(5.01)	33.04(32.31)
pregnancy, puerperium and perinatal conditions	abnormal cord insertion	4	40.45(13.83, 118.36)	40.45(13.76, 118.87)	128.26	5.08(3.7)	33.88(13.8)
gastrointestinal disorders	defaecation urgency	698	39.72(36.62, 43.08)	39.57(36.59, 42.8)	21949.9	5.06(4.94)	33.26(31.07)
gastrointestinal disorders	anal cyst	5	37.46(14.42, 97.27)	37.46(14.34, 97.87)	149.7	4.99(3.73)	31.76(14.29)
gastrointestinal disorders	anal blister	3	35.69(10.46, 121.8)	35.69(10.38, 122.69)	85.99	4.93(3.39)	30.49(10.92)
general disorders and administration site conditions	infusion site coldness	11	35.32(18.61, 67.01)	35.32(18.5, 67.44)	312.27	4.92(4.04)	30.22(17.68)
gastrointestinal disorders	frequent bowel movements	2445	33.24(31.84, 34.7)	32.81(31.55, 34.12)	64903	4.83(4.76)	28.37(27.36)
investigations	drug metabolising enzyme increased	3	31.94(9.45, 107.93)	31.94(9.48, 107.67)	77.65	4.79(3.26)	27.72(10.01)
nervous system disorders	primary progressive aphasia	3	31.94(9.45, 107.93)	31.94(9.48, 107.67)	77.65	4.79(3.26)	27.72(10.01)
pregnancy, puerperium and perinatal conditions	pregnancy	1189	31.25(29.39, 33.22)	31.05(29.28, 32.93)	29985.8	4.76(4.67)	27.05(25.7)
gastrointestinal disorders	pouchitis	62	31.21(23.88, 40.77)	31.2(23.71, 41.05)	1569.99	4.76(4.38)	27.16(21.71)
gastrointestinal disorders	anorectal stenosis	4	31.12(10.86, 89.17)	31.12(10.8, 89.68)	101.05	4.76(3.4)	27.1(11.23)
gastrointestinal disorders	gastrointestinal scarring	55	30.16(22.72, 40.03)	30.15(22.91, 39.67)	1348.93	4.72(4.32)	26.37(20.8)
infections and infestations	haemorrhoid infection	5	29.75(11.63, 76.06)	29.75(11.61, 76.22)	121.09	4.7(3.47)	26.06(11.88)
gastrointestinal disorders	colon dysplasia	26	29.06(19.26, 43.83)	29.05(19.25, 43.84)	615.86	4.67(4.1)	25.53(18.1)
investigations	pus in stool	10	28.49(14.7, 55.23)	28.49(14.63, 55.48)	232.49	4.65(3.74)	25.09(14.42)
gastrointestinal disorders	enterocolonic fistula	9	28.45(14.16, 57.15)	28.44(14.04, 57.59)	208.93	4.65(3.69)	25.06(13.98)
injury, poisoning and procedural complications	vascular access site pain	8	26.97(12.9, 56.4)	26.97(12.81, 56.8)	176.51	4.58(3.58)	23.91(12.9)
musculoskeletal and connective tissue disorders	arthritis enteropathic	22	26.33(16.89, 41.06)	26.33(16.78, 41.33)	474.36	4.55(3.93)	23.41(16.14)

## Sheet: Sheet1
SOC	PTs	Case Reports	ROR(95% CI)	PRR(95% CI)	chisq	IC(IC025)	EBGM(EBGM05)
gastrointestinal disorders	colitis ulcerative	8819	99.81(97.27, 102.41)	95.05(93.21, 96.93)	558741	6.02(5.99)	64.98(63.6)
gastrointestinal disorders	crohn's disease	6678	40.71(39.64, 41.81)	39.26(38.5, 40.04)	208755	5.05(5.01)	33.04(32.31)
gastrointestinal disorders	haematochezia	3169	19.92(19.2, 20.67)	19.59(18.84, 20.37)	51023.7	4.17(4.11)	17.95(17.41)
gastrointestinal disorders	frequent bowel movements	2445	33.24(31.84, 34.7)	32.81(31.55, 34.12)	64903	4.83(4.76)	28.37(27.36)
general disorders and administration site conditions	therapeutic reaction time decreased	1758	1734.45(1501.69, 2003.29)	1717.81(1497.58, 1970.43)	317774	7.51(7.41)	181.85(161.2)
pregnancy, puerperium and perinatal conditions	pregnancy	1189	31.25(29.39, 33.22)	31.05(29.28, 32.93)	29985.8	4.76(4.67)	27.05(25.7)
gastrointestinal disorders	mucous stools	738	59.9(55.17, 65.03)	59.66(55.16, 64.53)	32873.7	5.53(5.42)	46.3(43.22)
vascular disorders	poor venous access	728	26.31(24.35, 28.43)	26.21(24.23, 28.35)	15630.6	4.54(4.43)	23.32(21.86)
investigations	drug level decreased	707	23.2(21.46, 25.08)	23.11(21.37, 24.99)	13426.3	4.38(4.27)	20.85(19.53)
gastrointestinal disorders	defaecation urgency	698	39.72(36.62, 43.08)	39.57(36.59, 42.8)	21949.9	5.06(4.94)	33.26(31.07)
general disorders and administration site conditions	loss of therapeutic response	613	132.63(119.78, 146.85)	132.19(119.85, 145.8)	48267.7	6.33(6.19)	80.34(73.77)
musculoskeletal and connective tissue disorders	fistula	406	13.04(11.79, 14.42)	13.01(11.8, 14.35)	4230.82	3.62(3.47)	12.29(11.3)
gastrointestinal disorders	faeces soft	366	15.18(13.65, 16.88)	15.15(13.74, 16.71)	4500.1	3.82(3.67)	14.16(12.96)
infections and infestations	anal abscess	352	21.85(19.58, 24.4)	21.81(19.39, 24.53)	6310.5	4.31(4.15)	19.79(18.05)
gastrointestinal disorders	gastrointestinal inflammation	342	14(12.54, 15.62)	13.97(12.42, 15.71)	3853.31	3.72(3.56)	13.13(11.98)
gastrointestinal disorders	intestinal stenosis	298	25.22(22.35, 28.45)	25.18(22.39, 28.32)	6153.36	4.49(4.32)	22.5(20.34)
gastrointestinal disorders	anal fistula	289	18.66(16.54, 21.05)	18.63(16.56, 20.95)	4416.35	4.1(3.93)	17.15(15.5)
investigations	faecal calprotectin increased	238	23.04(20.15, 26.35)	23.01(20.06, 26.39)	4499.45	4.38(4.18)	20.76(18.56)
gastrointestinal disorders	proctalgia	222	12.71(11.09, 14.55)	12.69(11.06, 14.56)	2250.11	3.59(3.39)	12(10.71)
gastrointestinal disorders	anal fissure	208	13.48(11.72, 15.51)	13.47(11.74, 15.45)	2250.97	3.67(3.46)	12.69(11.28)
infections and infestations	abscess intestinal	131	22.51(18.79, 26.96)	22.49(18.85, 26.83)	2421.27	4.35(4.09)	20.34(17.49)
gastrointestinal disorders	dyschezia	131	12.82(10.75, 15.3)	12.81(10.74, 15.28)	1341.8	3.6(3.34)	12.11(10.45)
gastrointestinal disorders	large intestinal stenosis	127	20.78(17.31, 24.95)	20.77(17.41, 24.78)	2167.04	4.24(3.98)	18.93(16.24)
hepatobiliary disorders	cholangitis sclerosing	115	19.16(15.82, 23.19)	19.14(15.73, 23.28)	1806.71	4.14(3.86)	17.58(14.98)
infections and infestations	rectal abscess	109	22.7(18.62, 27.67)	22.68(18.64, 27.59)	2031.43	4.36(4.07)	20.5(17.37)
gastrointestinal disorders	ileal stenosis	103	23.29(18.99, 28.56)	23.28(19.14, 28.32)	1969.43	4.39(4.1)	20.98(17.69)
gastrointestinal disorders	proctitis	100	12.54(10.24, 15.35)	12.53(10.3, 15.24)	999.32	3.57(3.28)	11.86(10.01)
